# Supplementary material for: Fast and reliable detection of SARS-CoV-2 antibodies based on surface plasmon resonance
Source: Royal Society of Chemistry journal article supplement (doi:10.1039/d1ay00737h), 2021-01-01
Supplement: d1ay00737h1.pdf [file d1ay00737h1.pdf]

## Supporting Information

### A fast and reliable detection of SARS-CoV-2 antibodies based on surface plasmon resonance

Caroline Rodrigues Basso<sup>a\*</sup>, Camila Dantas Malossi<sup>a</sup>, Amanda Haisi<sup>a</sup>, Valber de Albuquerque Pedrosa<sup>b</sup>, Alexandre Naime Barbosa<sup>c</sup>, Rejane Tommasini Grotto<sup>d</sup>, João Pessoa Araujo Junior<sup>a</sup>.

<sup>a</sup> Institute of Biotechnology, UNESP- Botucatu, SP 18607-440, Brazil

<sup>b</sup> Department of Chemistry and Biochemistry, Institute of Bioscience, UNESP-Botucatu, SP 18618-000, Brazil

<sup>c</sup> Department of Infectious Diseases, Dermatology, Diagnostic Imaging and Radiotherapy, Faculty of Medicine of Botucatu, UNESP-Botucatu, SP 18618-687, Brazil

<sup>d</sup> Department of Medical Clinic, Faculty of Medicine of Botucatu, UNESP-Botucatu, SP 18618-687, Brazil

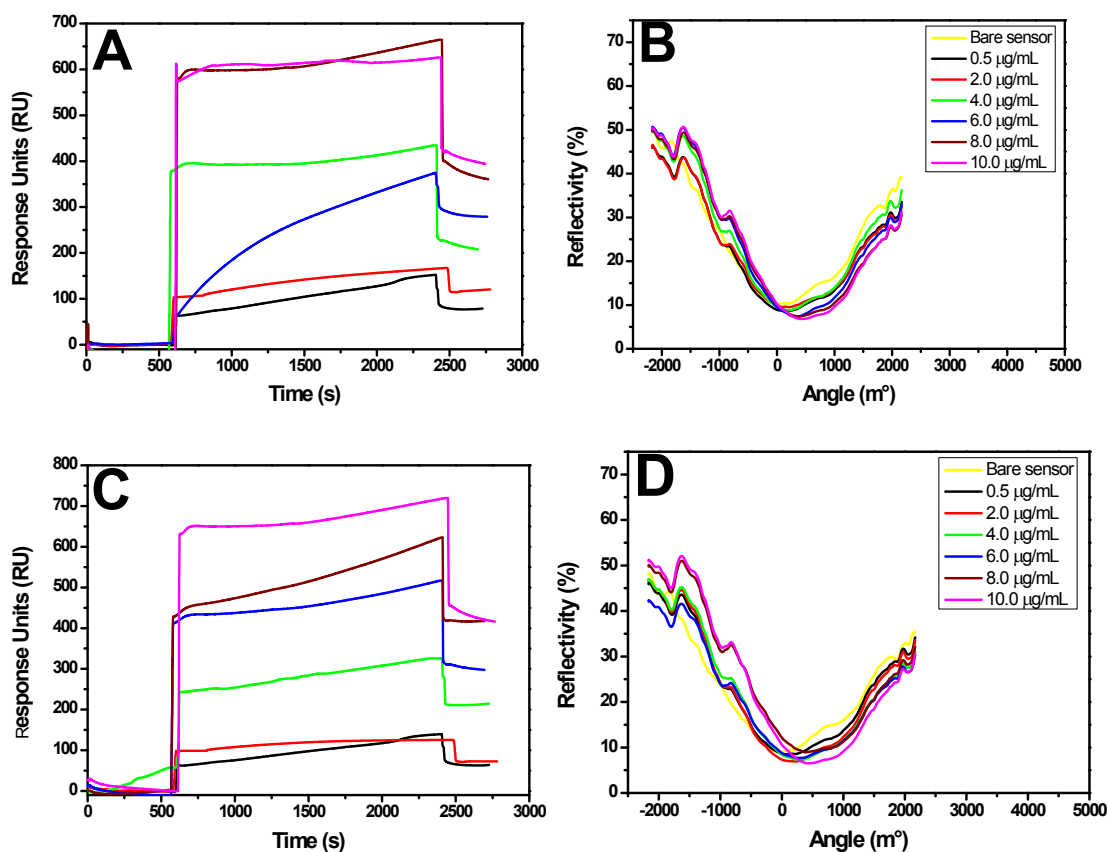

**Fig. S1.** Sensorgram generated for different N protein concentrations. A and C- N protein at: bare sensor (yellow line), 0.5 (black line), 2.0 (red line), 4.0 (green line), 6.0 (blue line), 8.0 (brown line) and 10.0 µg/mL (pink line). B and D- Variation of SPR angle response for different N protein concentration.

\* Corresponding author.  
E-mail address: caroline.basso@unesp.br

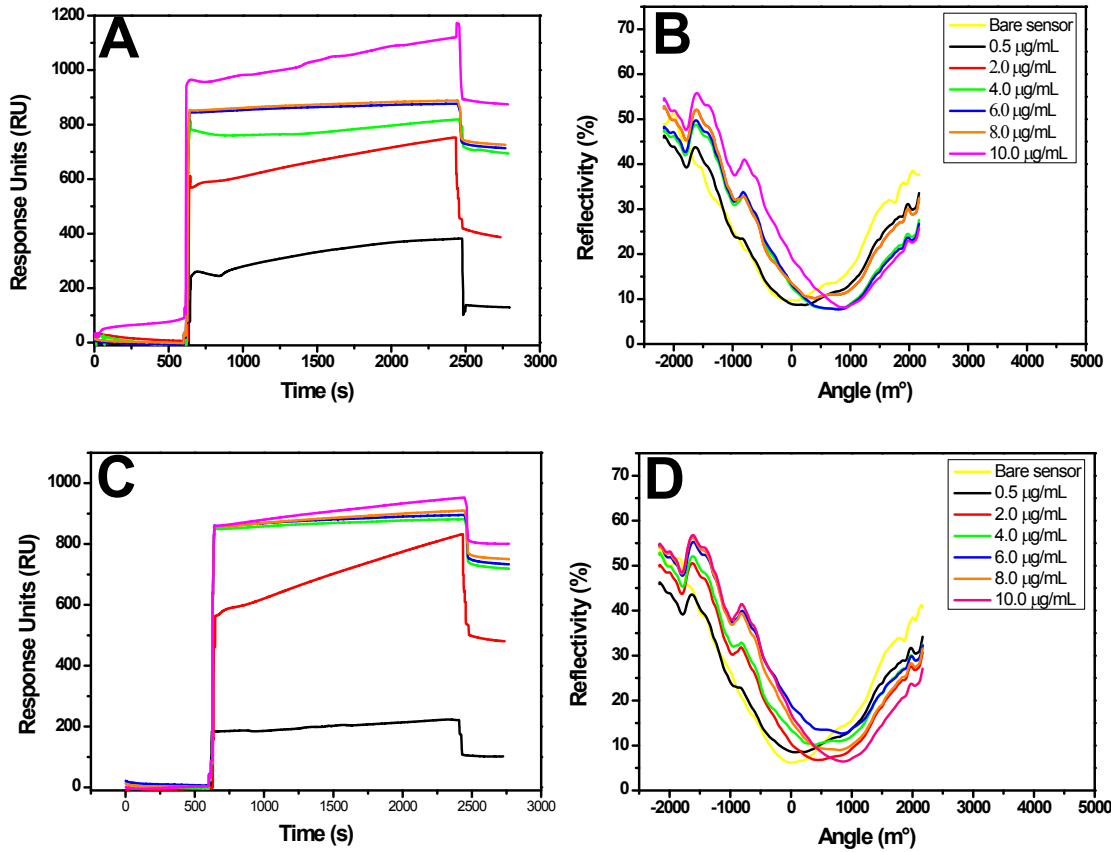

**Fig. S2.** Sensorgram generated for different S protein concentrations. **A** and **C**- N protein at: bare sensor (yellow line), 0.5 (black line), 2.0 (red line), 4.0 (green line), 6.0 (blue line), 8.0 (orange line) and 10.0 µg/mL (pink line). **B** and **D**- Variation of SPR angle response for different N protein concentration.

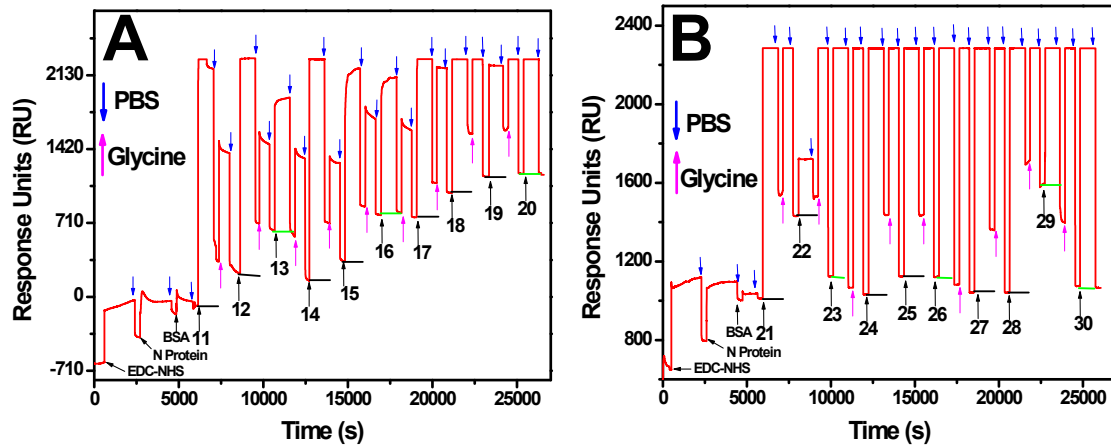

**Fig. S3.** SPR response to IgG antibodies. **A**- Graph showing changes on sensor surface due to the nucleocapsid protein (N) immobilization and Covid-19-positive (with antibodies) and -negative (without antibodies) sera injections (number samples 11-20). **B**- Sensor surface modification with number samples 21-30. All washing steps were performed based on PBS at pH 7.4; it represented by blue arrows down (↓) and every step of the sensor surface regeneration process was based on glycine-HCl solution; they are represented by pink arrows up (↑).

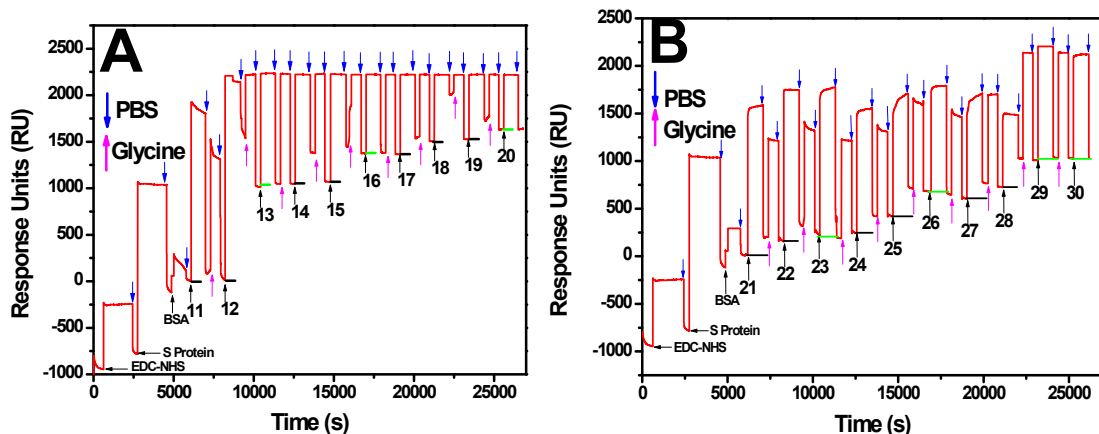

**Fig. S4.** SPR response to IgG antibodies. **A-** Graph showing changes on sensor surface due to spike (S) immobilization and Covid-19-positive (with antibodies) and -negative (without antibodies) sera injections (number samples 11-20). **B-** Sensor surface modification with number samples 21-30. All washing steps were performed based on PBS at pH 7.4; it represented by blue arrows down ( $\downarrow$ ) and every step of the sensor surface regeneration process was based on glycine-HCl solution; they are represented by pink arrows up ( $\uparrow$ ).

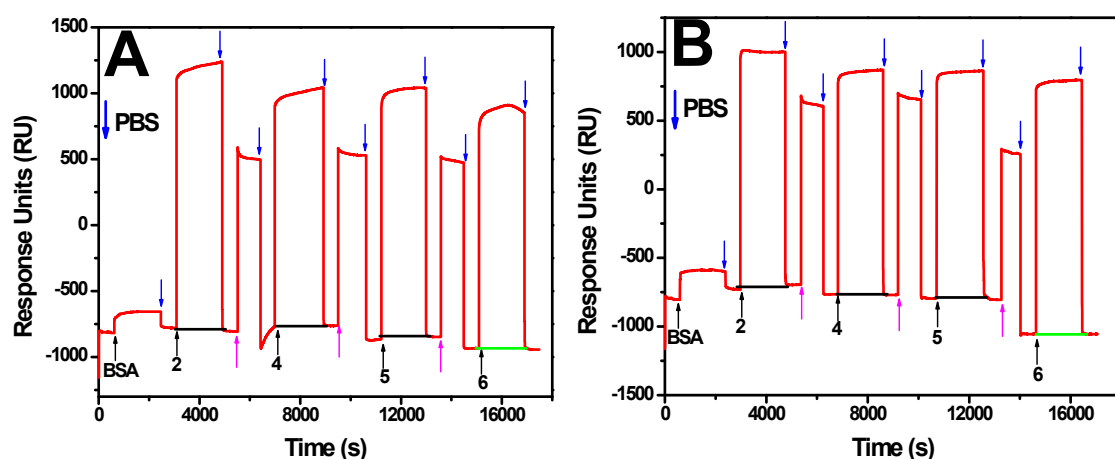

**Fig. S5.** SPR response binding specificity between antibodies-proteins using BSA solution. **A-** graph corresponding to the duplicate and, **B-** graph corresponding to the triplicate.
